# Supplementary material for: Warm-Water Intrusions onto the West Spitsbergen Shelf during Winter
Source: Copernicus journal article supplement (doi:10.5194/egusphere-2025-1721), 2025-04-25
Supplement: Supplementary file [file egusphere-2025-1721-AC1-supplement.pdf]

## **General comment**

This paper utilizes outputs from an ocean model to investigate mechanisms of Atlantic Water (AW) intrusions onto the West Spitsbergen Shelf (WSS) during winter. Authors describe different mechanisms, principally focusing on the influence of winds, characteristics of the Atlantic current, interactions among different water masses, and the interplay between these factors. I found the topic of this paper relevant and innovative, considering the current state of literature. To my knowledge, this is the first instance of an ocean model being used to assess the mechanisms behind different warming events on the WSS. The methodology adopted in this study is sound and appropriate to address the scientific questions. Even though this paper does not give a strong final message (this is understandable given the complexity of the system under study and the objective of the paper), I believe this work is informative and worth of publication.

However, I have concerns regarding the clarity and structure of the manuscript, which could be improved. I recommend the authors enhance the overall clarity of the manuscript by using a clear and concise language to effectively communicate the methodology, results and main findings. Consider integrating key information regarding the methodology into the main text rather than regarding all details to the appendices. I suggest the authors to more explicitly highlight the novel contributions of this study in relation to existing literature, particularly in the Summary and Conclusions section. A clear articulation of what is new and how it builds upon previous knowledge will help understand the significance of the findings.

Please refer to my minor comments for specific issues.

⇒ Thank you for this very positive and encouraging feedback. Especially the fact that there is a large agreement between the comments from you and the other referee review, provides a good basis for the revision of the manuscript. We have highlighted the novelty of our study as suggested and moved large parts of the information on the data processing from the Appendix to Section 2.2 (Data Processing and Analysis Methods) in the main body of the manuscript. We hope that we could satisfactorily address all points raised.

## **Minor comments**

Line 4: did you mean “excess” instead of “access”?

⇒ Yes, thanks for spotting this mistake.

Line 5: substitute “full” with “fully”

⇒ Done.

Line 12: consider substituting “near-surface” to “surface-layer”

⇒ Yes, thank you for this suggestion.

Lines 15-16: Including future research perspectives in the Abstract is out of scope, particularly since authors discuss fjords, but the paper is focused on the WSS and shelf break. I suggest the authors to keep this only in the final section of the manuscript.

⇒ We have removed the outlook from the Abstract and keep it to the respective Section 4 of the main manuscript now.

Line 27: Please add a reference for the statement “The NwAFC and the WSC merge west of Svalbard around 78° N”

⇒ Done.

Lines 30-31: Consider rephrasing the sentence to improve readability: move “typically” at the beginning of the sentence, substitute “of which one” with “one of which”. It is worth noting that this refers to the western branch of the WSC, as the eastern branch is introduced later.

⇒ Thank you for this detailed and very helpful comment, we have revised the manuscript accordingly.

Lines 40 and 41: Please provide references for the SPC and ECS.

⇒ Done.

Line 48: Consider replacing “restricts” with “prevents”

⇒ Done.

Lines 55-57: improve the clarity and readability of this sentence

⇒ We have re-written this part and hope it is more understandable now.

Figure 1: The figure appears well-designed, but the names of the Atlantic-type currents are hard to read against the blue background. Using bold font for these labels may enhance visibility. Additionally, please consider adding ticks for longitude and latitude values. The label '1' is not clearly connected to the coastal current; consider adding the 'SPC' label on the map where there is available space, along with a black line connecting it to the coastal current.

- ⇒ We have added small boxes around the labels to increase the readability. We have also added latitude and longitude ticks, and link labels for SPC and STC directly using lines rather than using the number.

Line 65: add “the” before “slope”

- ⇒ Well spotted, thank you.

Lines 77-79: Please consider improving readability of this sentence, as it is key to the present paper. Use the common forms as “gap of knowledge” and “This study aims ...”.

- ⇒ We have adjusted this sentence using the phrasing you suggested. Thank you for the suggestions.

Lines 81-82: This sentence regarding Isfjorden seems out of context.

- ⇒ We have moved this part into Section 2, where it indeed fits much better together with other information on how the data set was limited in space and time for the study.

Lines 81-84: I suggest to quickly recall the motivations why the authors focus the interest on winter months: sea-ice, water column stratification, preconditioning to summer, etc.

- ⇒ See reply above, this has been moved to Section 2 as well, and a reminder about the motivation has been added according to your suggestion.

Line 98: delete “for our purposes”

- ⇒ Done.

Figure 2: Add info regarding depth contour levels.

- ⇒ Done.

Lines 104-105: What does it mean “limited to”? Did you mean that the simulation ran from April 2019 to October 2024 but you considered only winter periods in the present analysis?

- ⇒ Yes, and we have re-written this sentence to make this clearer.

Line 110: Please consider adding a few lines at the end of this paragraph to summarize the key aspects of the model validation: key strengths and weaknesses, etc..

- ⇒ Done.

Lines 122-126: These sentences are difficult to understand, please improve their clarity.

- ⇒ We have rewritten the sentences to improve the readability.

Line 142: Consider adding here some key details characterizing this detection method. What are the temperature/salinity and eastward movement thresholds (i.e., minimum temperature/salinity anomaly and distance) that defined a warming event? Clarify when a warming event ends.

⇒ As suggested by your overall comment, we have moved the details on the warming event identification to Section 2.2 in the main part of the manuscript and revised it accordingly.

Line 165: delete “actually”

⇒ Done.

Lines 167-168: as these heat content values are relative to a previous state, I recommend adding a + in front of these numbers (also throughout the rest of the text and figures)

⇒ Yes, good idea, we have changed this throughout the manuscript.

Line 201-202: Can you add some numbers supporting this statement? For example, comparing the range of maximum heat content increases reached in different warming events for upwelling events vs onshore Ekman transport events.

⇒ This statement refers rather to the number of occurrences, and we have rephrased and added some numbers to clarify this.

Line 203: Add “meridional” to “negative wind stress”

⇒ Done.

Lines 209 and 210: add “zonal” after “negative” and after “accumulated”

⇒ Done.

Figure 3 (and similar figure 4):

- Consider moving the density colorbar to the left, adjacent to panel c, for improved reference.
- Caption (c): add “(orange lines)” after “...one specific isotherm...”. I have difficulties understanding how density between different orange lines was calculated. Please consider simplifying this part of the caption.
- Caption (d): what is the final heat increase? Does this refer to the heat increase at the last time step of the warming event?

- I see there are no data in 3c and 4c density sections in some near-bottom locations, whereas heat content increase data (3d and 4d) are present, why? Clarify this discrepancy.
  - The interpretability of figures 3c, 4c and 5 is difficult and not immediate. Here is a suggestion for the authors: plot 2 panels, one for the initial and another for the final time step of the warming event, each showing sections of density anomalies compared to the WSC core. This may lose the temporal information about the eastward progression of the AW along the shelf, but it may point directly to the importance of the density difference between AW and shelf ambient waters.
- ⇒ Thank you for these very detailed and helpful comments regarding this Figure. We were aware from the beginning that especially panel (c) can be difficult to explain. We have improved the structure of the figure by moving the color bars as you have suggested. We have streamlined the figure caption, while at the same time adding extensive explanation about the composition of panel (c) in the Appendix. We would really like to stick to this presentation, and hope the additional explanation in the Appendix allow for this.

Figure 6 caption: add definition of depth contour levels

⇒ Done.

Line 262: Is “decreasing” correct? I believe authors meant “increasing”.

⇒ We believe “decreasing” is correct: Southerly winds are typically stronger further west, farther away from land in central Fram Strait. Therefore, eastward Ekman transport is also larger in the west and decreases towards the shelf and the Spitsbergen coastline. In any case, we have slightly reformulated this sentence to avoid confusion.

Lines 280-283: Is it possible to quantify the occurrence and significance of such events? The current text is vague, using terms like “during certain periods”, “frequently”, “often”. I suggest being clearer about the real influence of this mechanism, if possible, as the authors argue that this represents an additional mechanism for WSS warming.

⇒ Yes, thank you for this valuable input. We have strengthened our point by specifically providing numbers to the occurrences.

Lines 284-287: I suggest rewriting this sentence to render it clearer, as currently it is too long and complex.

⇒ We have split this sentence into smaller parts and slightly rewritten it to increase the readability.

Lines 293-296: I suggest recalling a figure for the reader to consult for further clarification.

⇒ We have added references to both Figure 10 and the respective section of the manuscript.

Figure 7: Please adjust the y-axis labels of panels d, e and f to prevent overlap. Add description of grey line in panel f.

⇒ Done.

Figure 8 caption: Clarify the significance of black dashed line in panel b

⇒ Done.

Figure 9 caption: Please add panel names following the parameters listed.

⇒ Done.

Table 2: this table would benefit from including the total on-shelf heat increase from Table 1. This addition would provide readers with a quick quantitative comparison of the different events and mechanisms. It would also say something more about the magnitude of those events lacking a clear driving mechanism.

⇒ Yes, very good point, adding the column on the total heat content increase helps to compare the effects of the different forcing processes. Thank you for this suggestion, we have implemented it in the revised manuscript.
